# Supplementary material
Source: publisher figshare collection journal article supplement (https://sage.figshare.com/ndownloader/files/43600008)
Supplement: Supplementary file 1 [file 43600008]

| **Supplementary Table 1. Diagnosis- and ATC-codes used to identify persons with non-communicable diseases (NCDs) described in Figure 2, 3 and 4.** | | | |
| --- | --- | --- | --- |
| **NCD** | ICD-10  (NPR, CPHR) | ICPC-2  (CPHR) | ATC  (NorPD) |
| **a) Diabetes** | E10-E14, O244 | T89-T90, W85 | A10A, A10B |
| **b) CVD** | I00-I99,  except I00-I02, I10, I269, I281-I309, I312-I339, I40-I41, I76, I781-I789, I80-I81, I822, I824, I826, I828, I829, I83, I86, I871-I872, I878-I880, I888-I889, I95, I96, I973-I999 | K70-K99,  except K86, K88, K93, K95, K96, K99 | B01, C,  except C01C, C05, C10,  *reimbursed with an ICD-10 or ICPC-2 code corresponding to the CVD definition for NPR and CPHR* |
| **c) COPD** | J43-J44 | R95 | R03AC R03AK, R03AL, R03BB, R03DA, R03DX07  (except R03AC02, R03AC03, R03AC04), *reimbursed with J43-44 or R95* |
| **d) Cancer** | C00-C96 | A79, B72-B74, D74-D77, R84-R85, L71, N74, S77, T71, U75-U77, W72, X75-X77, Y77-Y78 | NorPD replaced by CRN with 5-year look-back (ICD-10: C00-C96) |
| **e) Mental disorders** | F20-F48 | P72-P79, P82, P98 | N05A, N06A, N06BA |
| **f) Drug-use disorders** | F10-F19, G312, G621, G721, I426, K292, K700-K704, K709, K860, O354, P043, Q860 | P15-P16, P18-P19 | N07BB, N07BC |
| NCD, Non-communicable diseases; ICD-10, International Classification of Diseases - 10th revision; ICPC-2, International Classification of Primary Care - 2nd edition; ATC, Anatomical Therapeutical Chemical system; NPR, Norwegian Patient Registry; CPHR, Norwegian database for Control and Payment of Health Reimbursement; NorPD, The Norwegian Prescription Database; CVD, Cardiovascular diseases; COPD, Chronic obstructive pulmonary disease; CRN, the Cancer Registry of Norway. | | | |
